# Supplementary figures and images for: AAV ablates neurogenesis in the adult murine hippocampus
Source: eLife journal article supplement (doi:10.7554/elife.59291), 2021-07-14

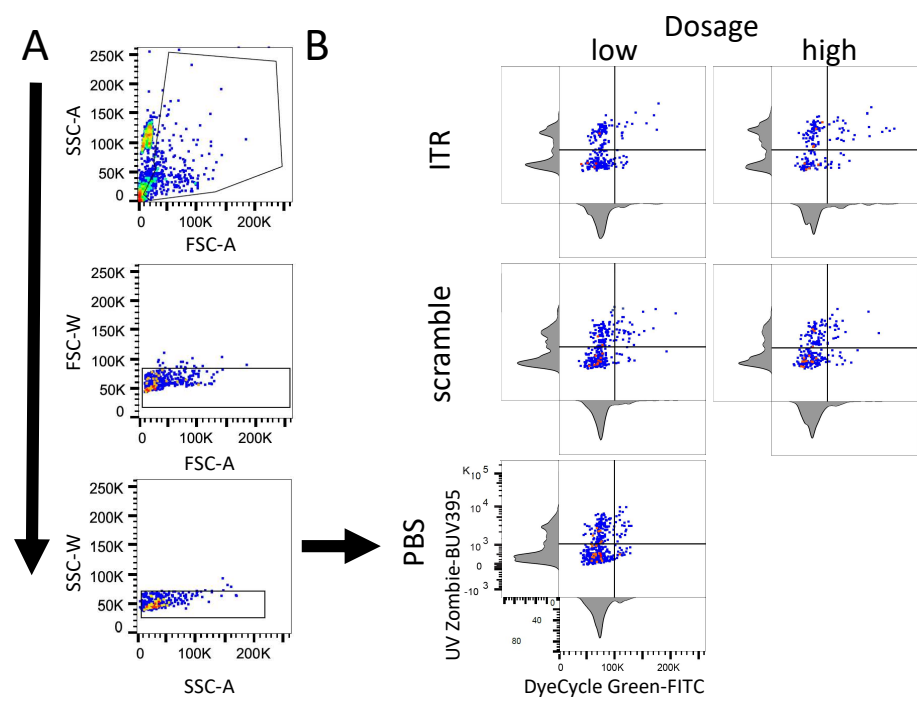

Supplement: supp [file elife-59291-supp-v1.zip]

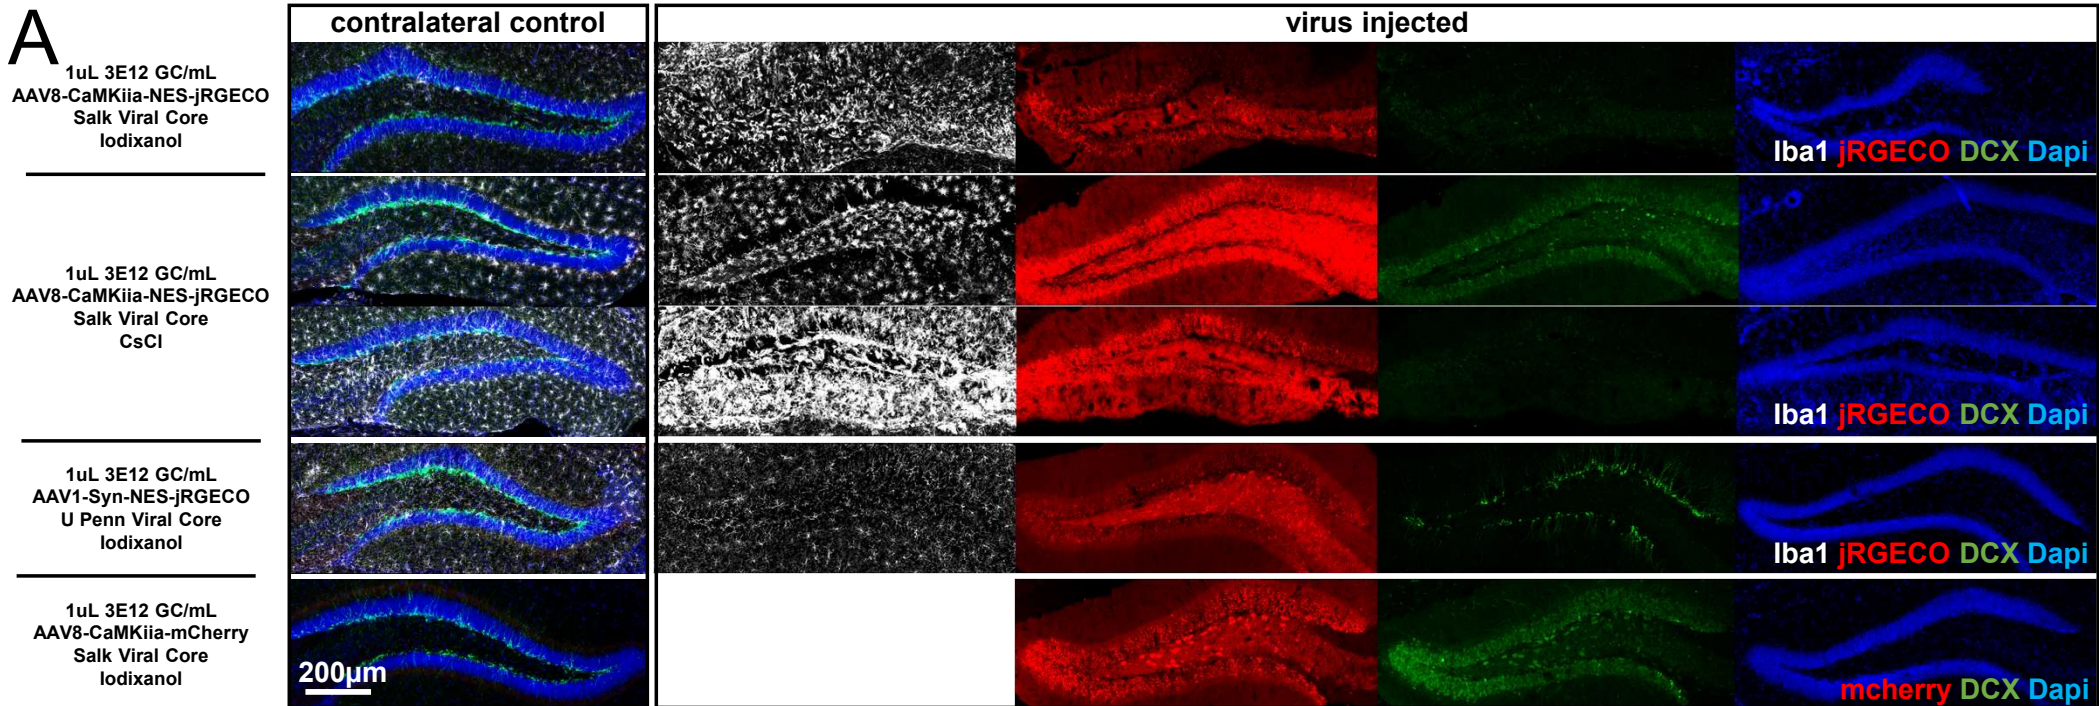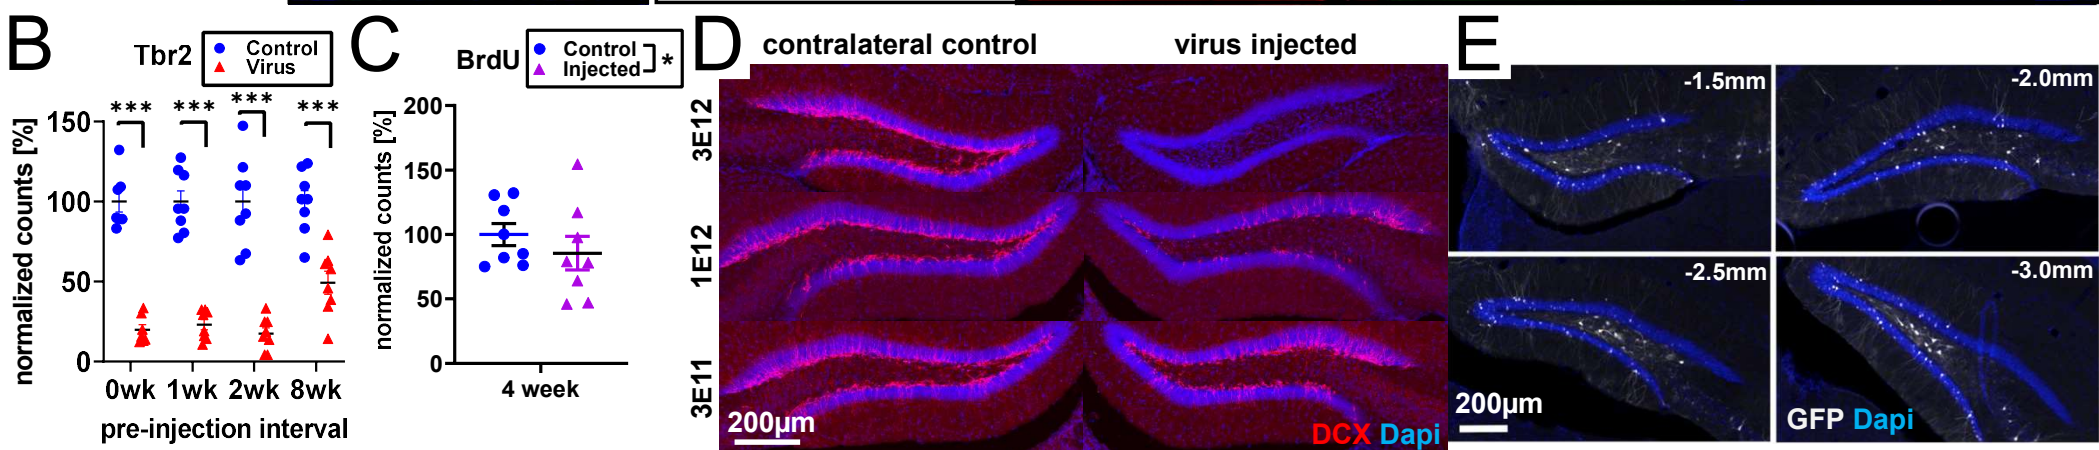

Supplement: supp [file elife-59291-supp-v1.zip]

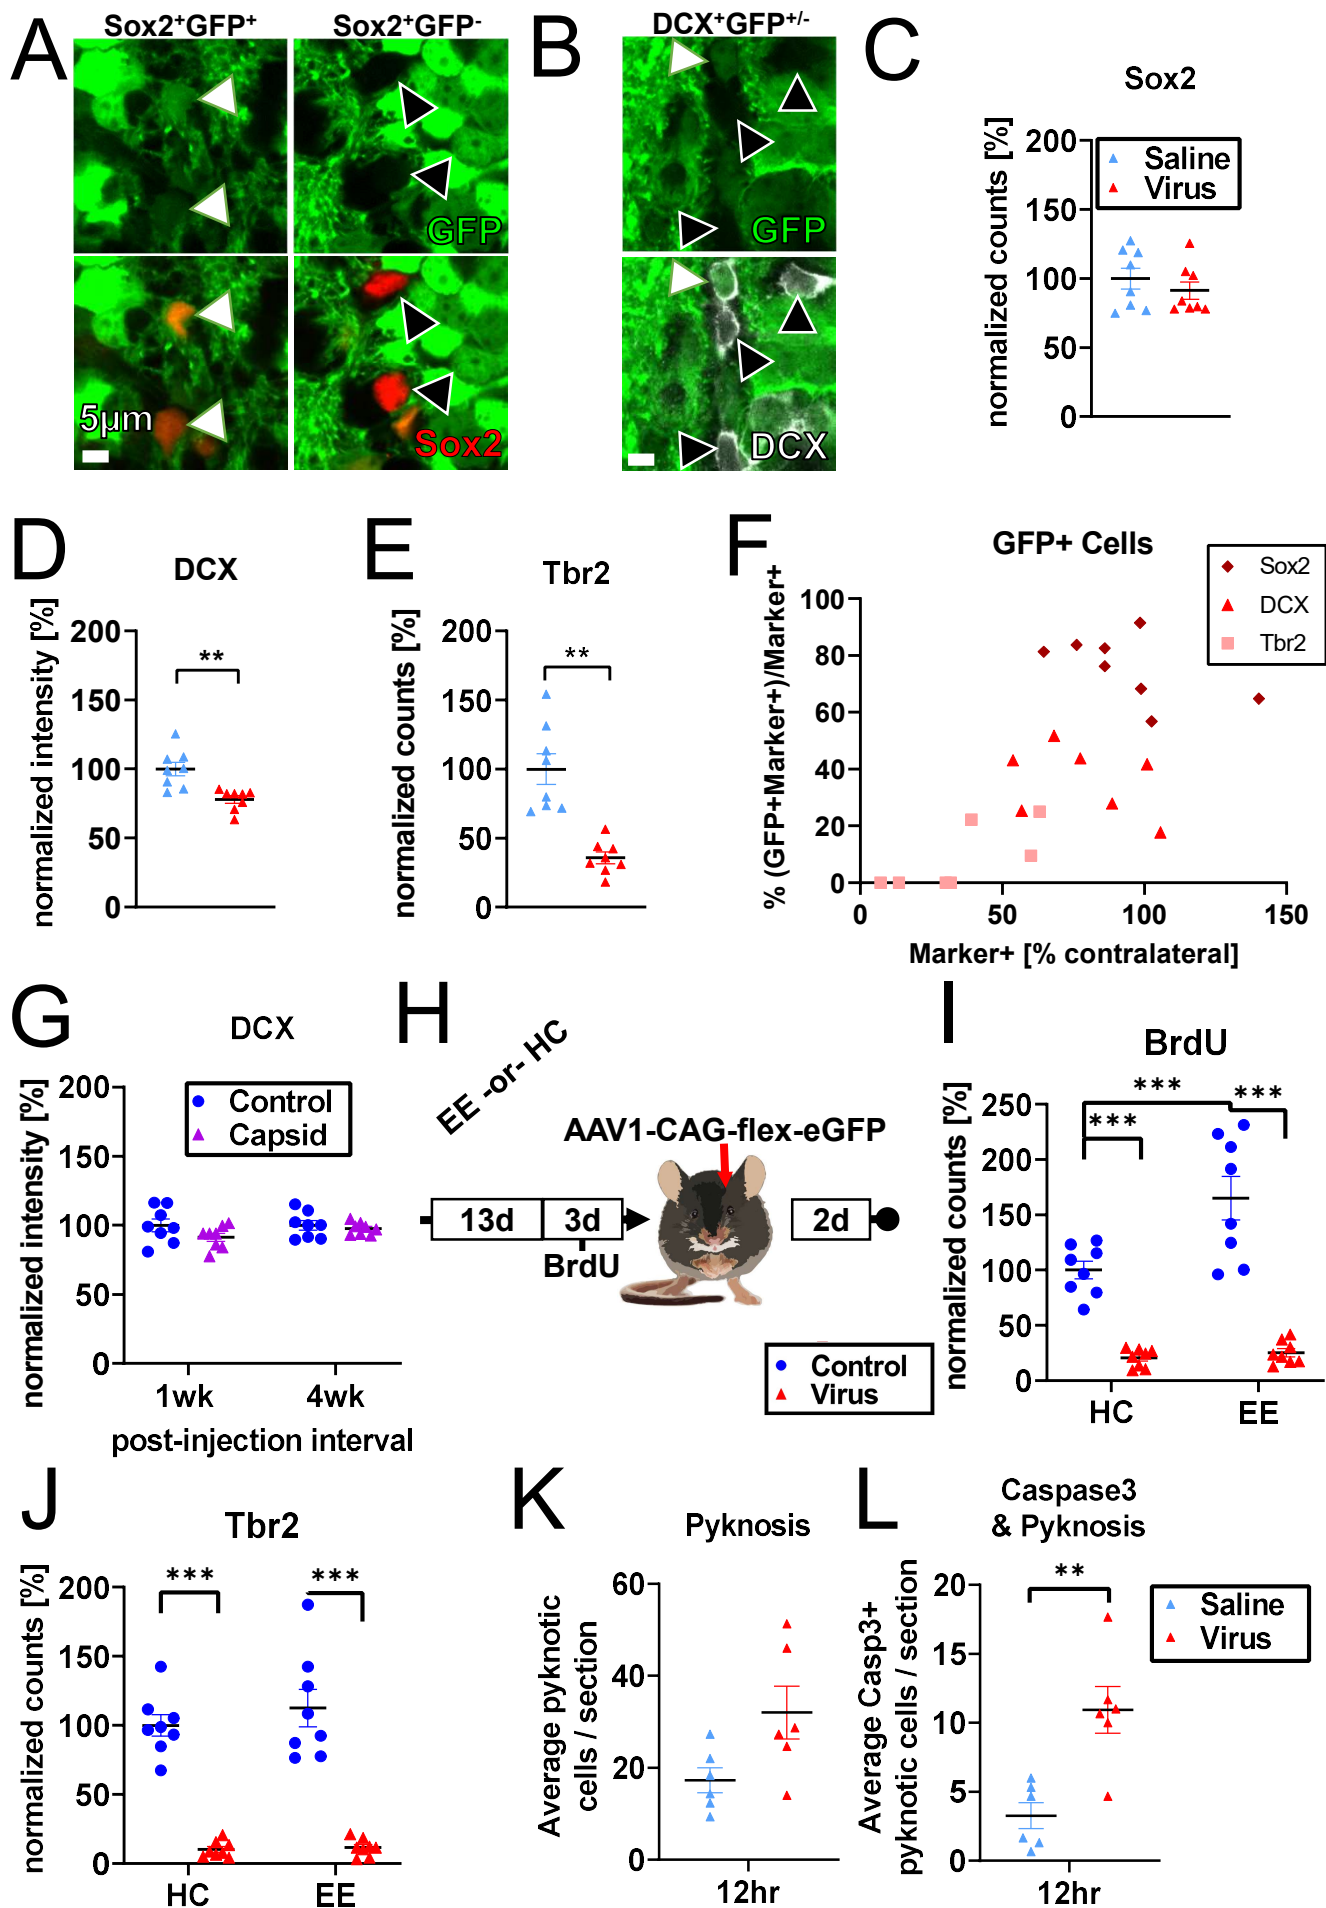

Supplement: supp [file elife-59291-supp-v1.zip]

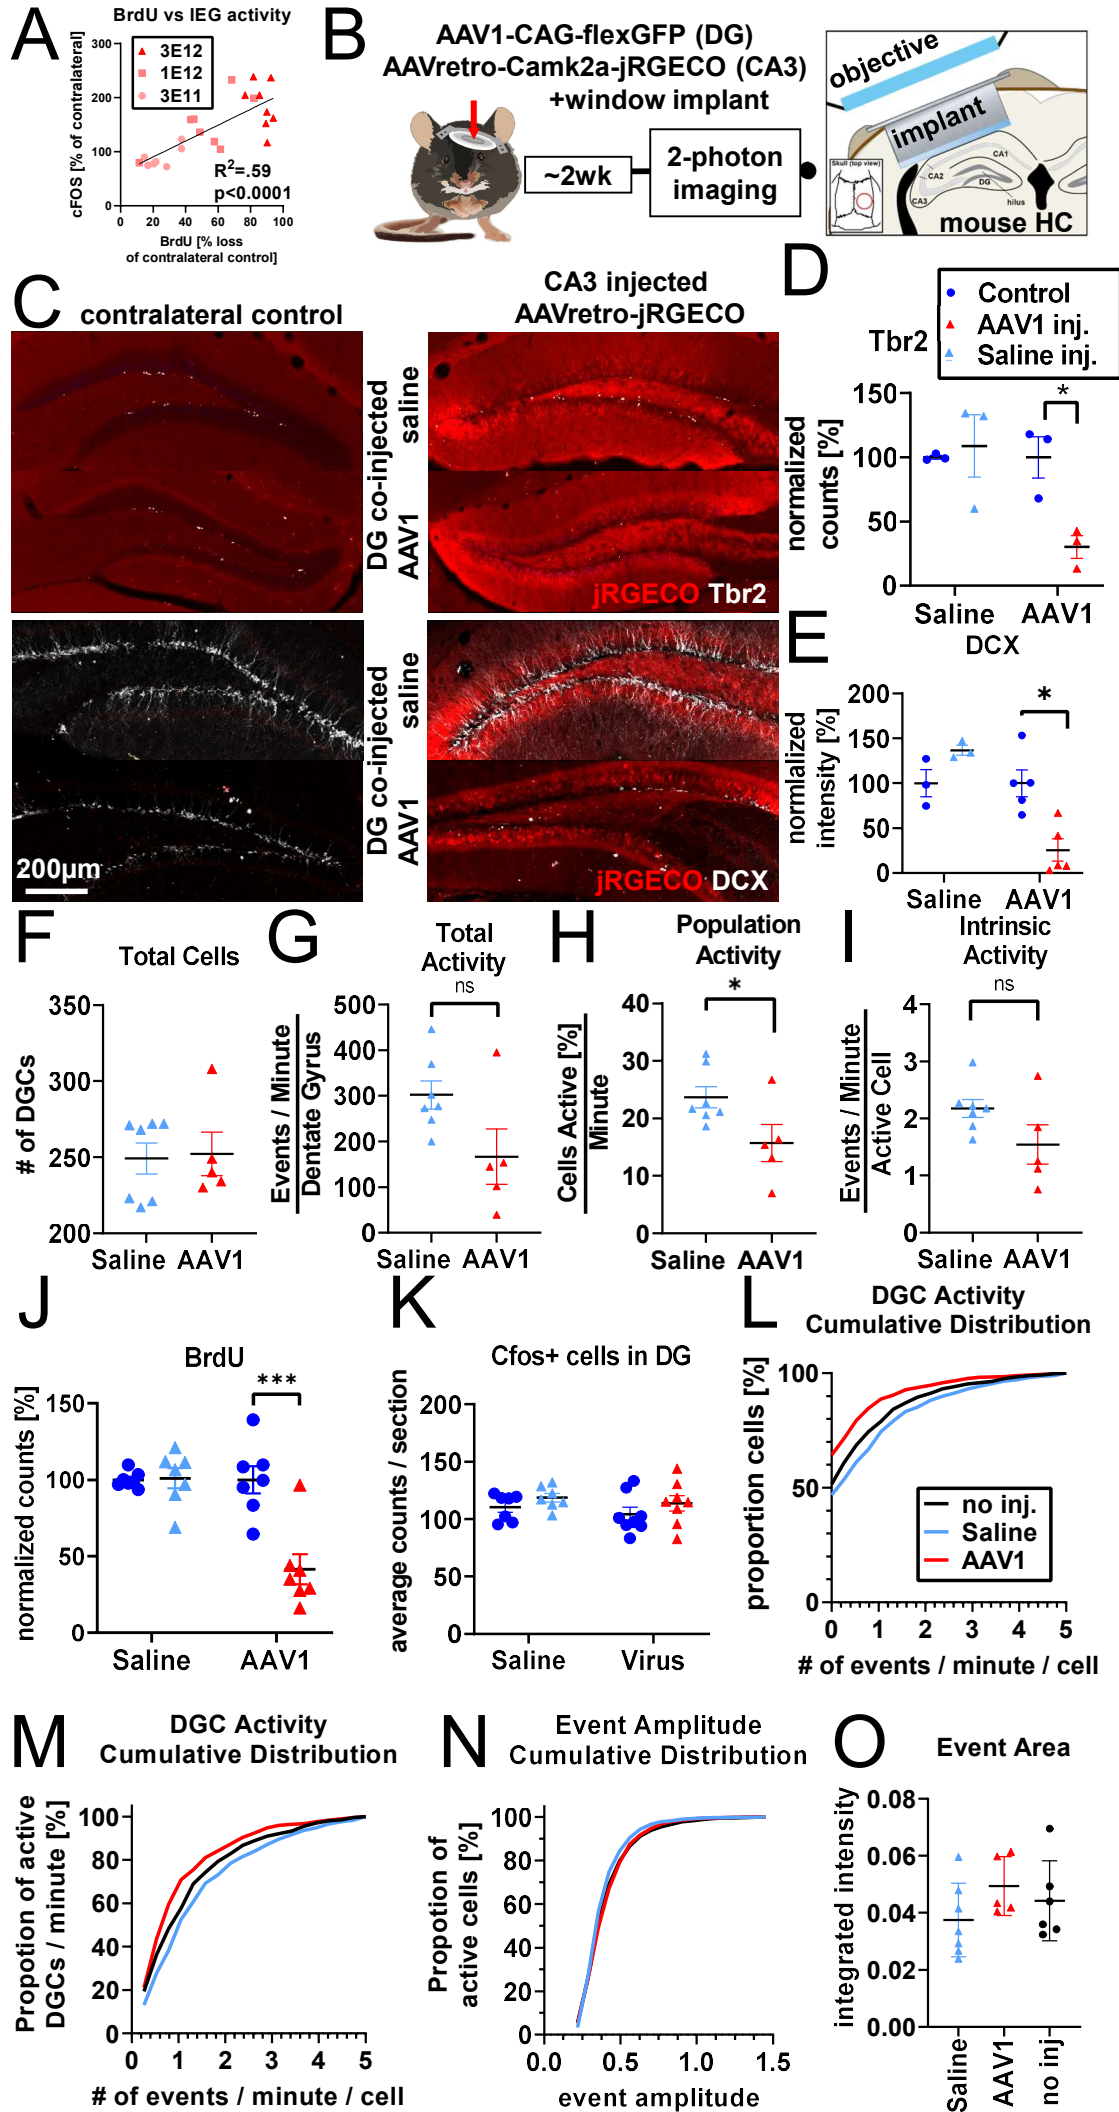

Supplement: supp [file elife-59291-supp-v1.zip]

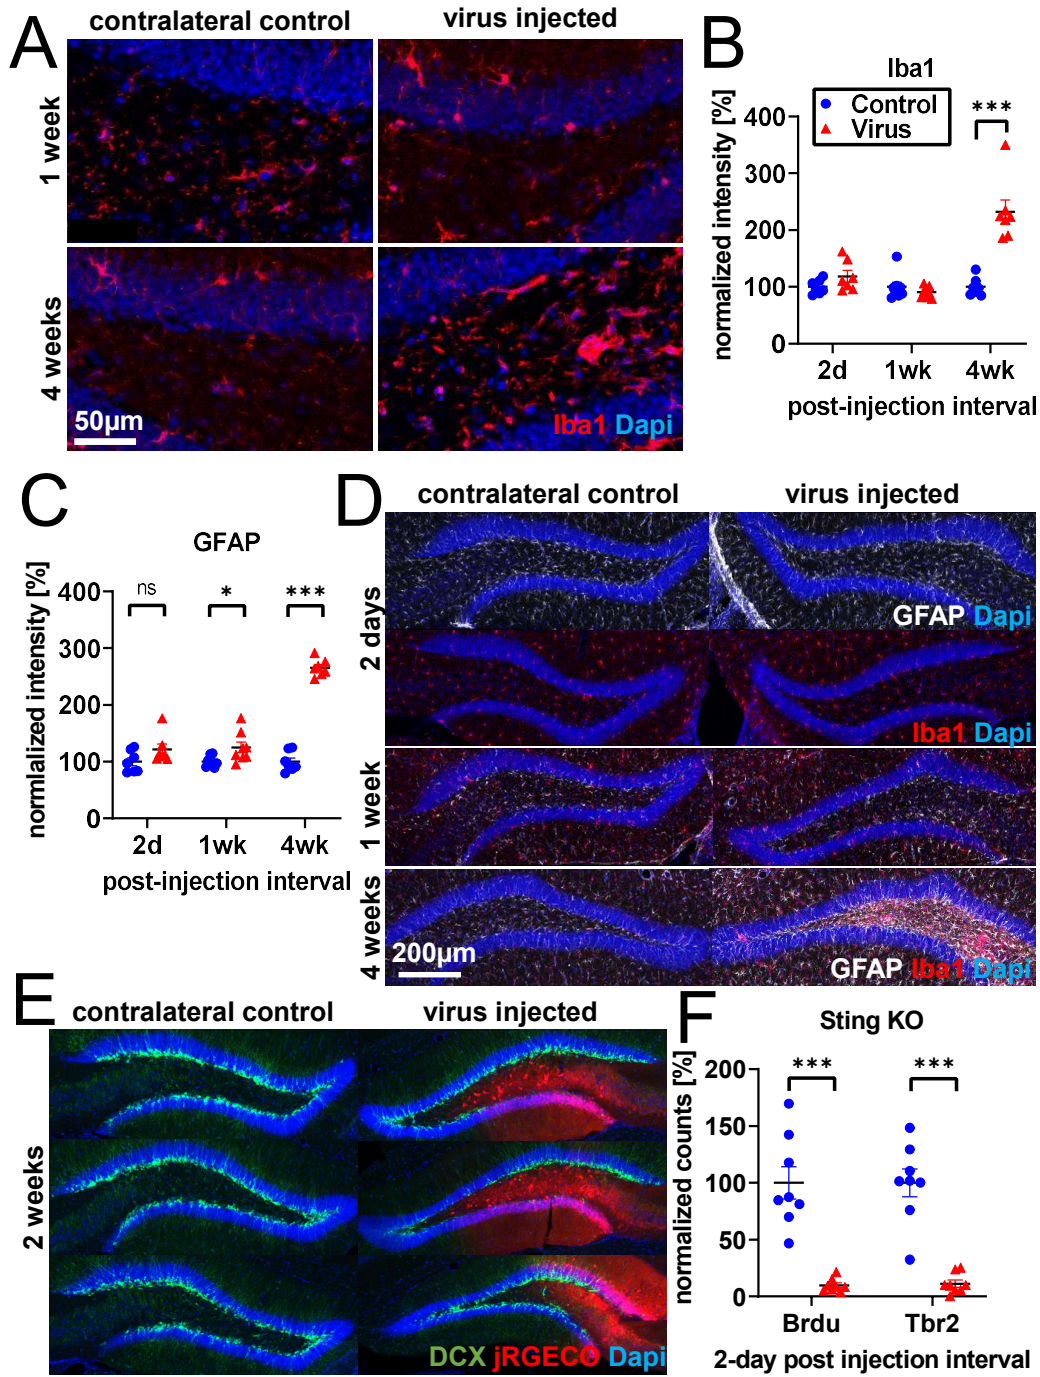

Supplement: supp [file elife-59291-supp-v1.zip]
